# Supplementary material for: Poly(N-vinylpyrrolidone)-grafted poly(dimethylsiloxane) surfaces with tunable microtopography and anti-biofouling properties
Source: Royal Society of Chemistry journal article supplement (doi:10.1039/c3ra23069d), 2013-01-01
Supplement: c3ra23069d.pdf [file c3ra23069d.pdf]

## Poly(*N*-vinylpyrrolidone)-Grafted Poly(dimethylsiloxane) Surfaces with Tunable Microtopography and Anti-biofouling Properties

Xiaoli Liu, Weifang Tong, Zhaoqiang Wu\* and Wenwen Jiang

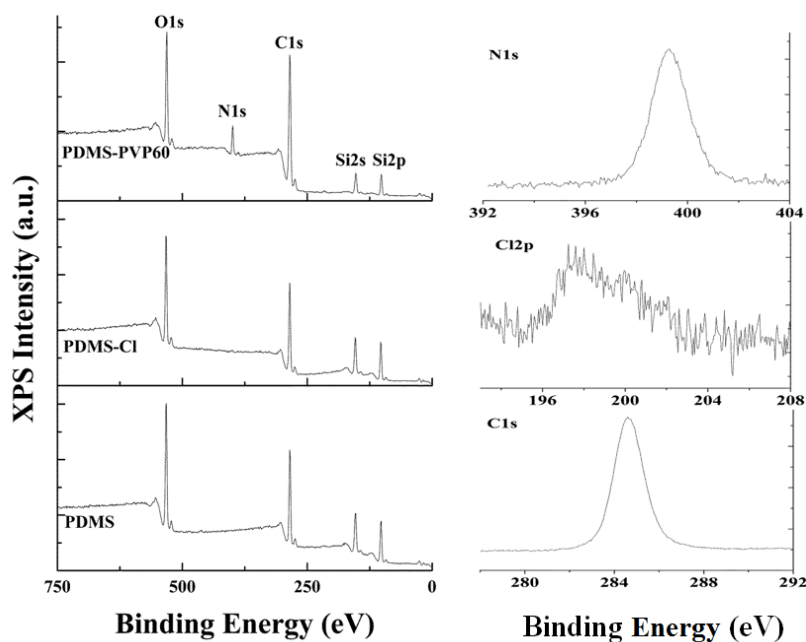

**Figure S1.** XPS survey spectra (left) and high-resolution spectra (right) of PDMS, PDMS-Cl, and PDMS-PVP60 surfaces (bottom to top).

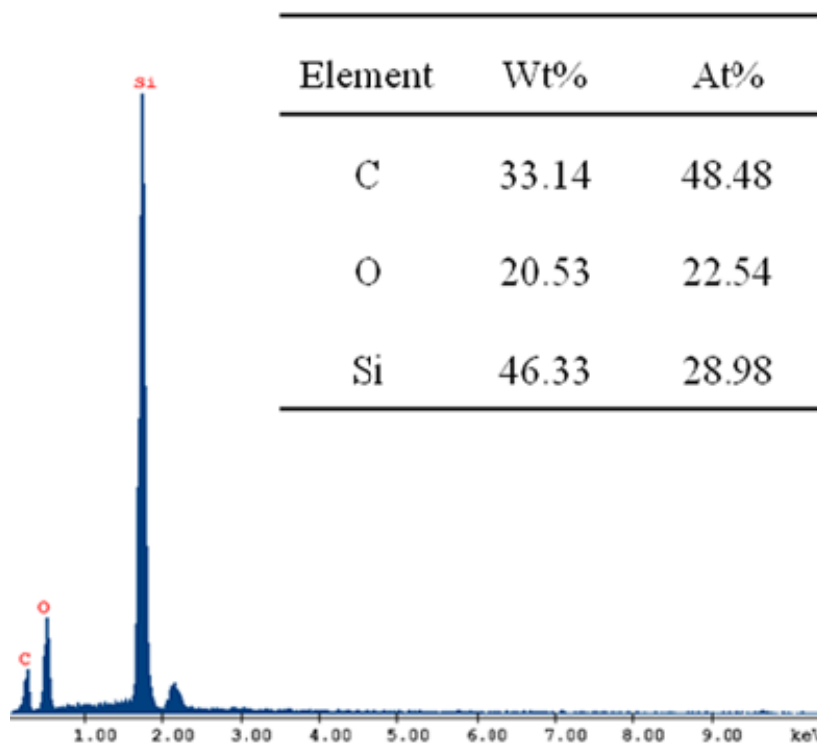

**Figure S2.** EDX results of PDMS-NH<sub>2</sub>. The ratio of carbon to silicon was 1.7.
